# Supplementary material for: Scoping review of healthcare professionals’ views on intimate partner violence in the Middle East and North Africa
Source: HighWire-hosted journal article supplement (doi:10.1136/bmjopen-2023-079866), 2024-08-01
Supplement: bmjopen-2023-079866supp002_data_supplement.pdf [file bmjopen-2023-079866supp002_data_supplement.pdf]

**Additional File 2: Articles Included in the Scoping Review (n=29)**

1. van den Aamele S, Keygnaert I, Rachidi A, Roelens K, Temmerman M. The role of the healthcare sector in the prevention of sexual violence against sub-Saharan transmigrants in Morocco: a study of knowledge, attitudes and practices of healthcare workers. *BMC Health Services Research*. 2013;13(1):77.
2. Boy A, Kulczycki A. What we know about intimate partner violence in the Middle East and North Africa. *Violence Against Women*. 2008;14(1):53-70
3. Qasem HD, Hamadah FA, Qasem KD, Kamel MI, El-Shazly MK. Knowledge and attitude of primary health care staff screening and not screening for domestic violence against women. *Alexandria Journal of Medicine*. 2013;49(2):181-7.
4. AbuTaleb NI, Dashti TA, Alasfour SM, Elshazly M, Kamel MI. Knowledge and perception of domestic violence among primary care physicians and nurses: A comparative study. *Alexandria Journal of Medicine*. 2012;48(1).
5. Alazmy SF, Alotaibi DM, Atwan AA, Kamel MI, El-Shazly MK. Gender difference of knowledge and attitude of primary health care staff towards domestic violence. *Alexandria Journal of Medicine*. 2011;47(4).
6. Almutairi M, Alkandari AM, Alhouli H, Kamel MI, El-Shazly MK. Domestic violence screening among primary health care workers in Kuwait. *Alexandria Journal of Medicine*. 2013;49(2):169-74.
7. Alsafy NN, Alhendal ES, Alhawaj SH, El-Shazly MK, Kamel MI. Knowledge of primary care nurses regarding domestic violence. *Alexandria Journal of Medicine*. 2011;47(2):173-80.
8. Almutairi GD, Alrashidi MR, Almerri AT, Kamel MI, El-Shazly M. How to screen for domestic violence against women in primary health care centers. *Alexandria Journal of Medicine*. 2013;49(1):89-94.
9. Alotaby IY, Alkandari BA, Alshamali KA, Kamel MI, El-Shazly M. Barriers for domestic violence screening in primary health care centers. *Alexandria Journal of Medicine*. 2013;49(2):175-80.
10. Alsabhan EH, Al-Mutairi MM, Al-Kandari WA, Kamel MI, El-Shazly MK. Barriers for administering primary health care services to battered women: Perception of physician and nurses. *Alexandria Journal of Medicine*. 2011;47(4).
11. Alkhabaz AA, Hammadi TA, Alnoumas SR, Ghayath TA, Kamel MI, El-Shazly MK. Comparison of Attitude of Primary Health Care Physicians and Nurses Towards Domestic Violence Against Women. *Bull Alex Fac Med*. 2010;46(4):371-6.
12. Goldblatt H. Caring for abused women: impact on nurses' professional and personal life experiences. *J Adv Nurs*. 2009;65(8):1645-54.
13. Ben Natan M, Ben Ari G, Bader T, Hallak M. Universal screening for domestic violence in a department of obstetrics and gynaecology: a patient and carer perspective. *International Nursing Review*. 2012;59(1):108-14.
14. Natan MB, Rais I. Knowledge and attitudes of nurses regarding domestic violence and their effect on the identification of battered women. *J Trauma Nurs*. 2010;17(2):112-7.
15. Al-Natour A, Qandil A, Gillespie GL. Nurses' roles in screening for intimate partner violence: a phenomenological study. *Int Nurs Rev*. 2016;63(3):422-8.
16. Al-Natour A, Gillespie GL, Felblinger D, Wang LL. Jordanian nurses' barriers to screening for intimate partner violence. *Violence Against women*. 2014;20(12):1473-88.
17. Al-Natour A, Qandil A, Gillespie GL. Intimate partner violence screening barriers as perceived by Jordanian nurses: A qualitative descriptive study. *Journal of Nursing Education and Practice*. 2015;5(9):11-6.
18. Aksan HAD, Aksu F. The training needs of Turkish emergency department personnel regarding intimate partner violence. *BMC Public Health*. 2007;7(1):350.
19. Yousefnia N, Nekuei N, Farajzadegan Z. The relationship between healthcare providers' performance regarding women experiencing domestic violence and their demographic characteristics and attitude towards their management. *J Inj Violence Res*. 2018;10(2):113-8.
20. Rasoulilian M, Shirazi M, Nojomi M. Primary health care physicians' approach toward domestic violence in Tehran, Iran. *Medical Journal of the Islamic Republic of Iran*. 2014;28:148.

21. Alsaedi JA, Elbarrany WG, AL Majnon WA, Al-Namankany AA. Barriers that Impede Primary Health Care Physicians from Screening Women for Domestic Violence at Makkah ALmukarramah City. *The Egyptian Journal of Hospital Medicine*. 2017;69(8):3058-65.
22. Zaher E, Mason R. Saudi Family-Medicine Residents' Readiness to Manage Intimate Partner Violence: A Needs Assessment Study. *World Family Medicine Journal: Incorporating the Middle East Journal of Family Medicine*. 2014;99(1145):1-6.
23. Colombini M, Alkaiyat A, Shaheen A, Garcia Moreno C, Feder G, Bacchus L. Exploring health system readiness for adopting interventions to address intimate partner violence: a case study from the occupied Palestinian Territory. *Health Policy Plan*. 2020;35(3):245-56.
24. Aziz MM, El-Gazzar AF. Health care providers' perceptions and practices of screening for domestic violence in Upper Egypt. *Sex Reprod Healthc*. 2019;20:93-9.
25. Guruge S, Bender A, Aga F, Hyman I, Tamiru M, Hailemariam D, et al. Towards a global interdisciplinary evidence-informed practice: intimate partner violence in the Ethiopian context. *ISRN nursing*. 2012;2012.
26. Usta J, Feder G, Antoun J. Attitudes towards domestic violence in Lebanon: a qualitative study of primary care practitioners. *The British journal of general practice : the journal of the Royal College of General Practitioners*. 2014;64(623):e313-e20.
27. Ahmed AM, Abdella ME, Yousif E, Elmardi AE. Response of Sudanese doctors to domestic violence. *Saudi Medical J*. 2003;24(10):1077-80.
28. Ibrahim E, Hamed N, Ahmed L. Views of primary health care providers of the challenges to screening for intimate partner violence, Egypt. *Eastern Mediterranean health journal*. 2021 Mar 1;27(3).
29. Als Salman Z, Shafey M, Al Ali L. Intimate Partner Violence; Are Saudi Physicians in Primary Health Care Setting Ready to Identify, Screening, and Respond? *Int J Womens Health* 2023;15:623-33. doi: 10.2147/ijwh.S401926 [published Online First: 20230418]
